# Supplementary material for: Effect of epigallocatechin gallate on dental biofilm of Streptococcus mutans: An in vitro study
Source: Springer Nature journal article supplement (doi:10.1186/s12903-021-01798-4), 2021-09-15
Supplement: 12903_2021_1798_MOESM1_ESM.pdf [file 12903_2021_1798_MOESM1_ESM.pdf]

## **Supplementary data**

### **Effect of epigallocatechin gallate on dental biofilm of *Streptococcus mutans*: An *in vitro* study**

Mor Schneider-Rayman, Doron Steinberg, Ronit Vogt Sionov, Michael Friedman, Miriam Shalish

**Table 1.** The primers used for real-time PCR.

| Gene            | Description                                              | Primer Sequence (5'->3')   |                                |
|-----------------|----------------------------------------------------------|----------------------------|--------------------------------|
|                 |                                                          | Forward                    | Reverse                        |
| <i>gtfB</i>     | Glucosyltransferase enzymes, glucan production           | AGCAATGCAGCCAATCTACAAAT    | ACGAACTTTGCCGTTATTGTCA         |
| <i>gtfC</i>     |                                                          | CTCAACCAACCGCCACTGTT       | GGTTTAACGTCAAATTAGCTGTATT      |
| <i>ftf</i>      | Fructosyltransferase enzyme, fructan production          | AAATATGAAGGCGGCTACAACG     | CTTCACCAGTCTTAGCATCCTGAA       |
| <i>brpA</i>     | Biofilm-regulatory protein                               | GGAGGAGCTGCATCAGGATTC      | AACTCCAGCACATCCAGCAAG          |
| <i>luxS</i>     | Universal quorum sensing                                 | ACTGTTCCCTTTTGGCTGTC       | AACTTGCTTTGATGACTGTGGC         |
| <i>recA</i>     | Homologous recombination of chromosomal DNA              | AGG TGC AGT TAT GCG TCT GG | GCA ACA GCA TGA AGA GCG AC     |
| <i>nox</i>      | NADH oxidation reduction                                 | GGGTTGTGGAATGGCACTTTGG     | CAATGGCTGTCACTGGCGATTC         |
| <i>sodA</i>     | Superoxidase dismutase                                   | GCAGTGCTAAGACTCCCGAATC     | TTGCGGAAGTGTGAGATTGGC          |
| <i>vicR</i>     | Cytoplasmic response regulator –modulate gene expression | TGACACGATTACAGCCTTTGATG    | CGTCTAGTTCTGGTAACATTAAGTCCAATA |
| <i>spaP</i>     | Cell surface antigen                                     | GACTTTGGTAATGGTTATGCATCAA  | TTTGTATCAGCCGGATCAAGTG         |
| <i>groEL</i>    | Tolerance to environmental stresses                      | CCAGGAGCTTTGACTGCGAC       | TTGCGGATGATGATGTAGATGGT        |
| <i>dnaK</i>     | Tolerance to environmental stresses                      | GCAGGTCAAGAGGGAGCTCA       | CCGCCCTTGCTGAGAATC             |
| <i>16S rRNA</i> | Normalizing internal standard                            | CCTACGGGAGGCAGCAGTAG       | CAACAGAGCTTTACGATCCGAAA        |
| <i>23S rRNA</i> |                                                          | GTGACGGGGAGCGAAGTT TA      | TCACTGCGGCTGACTTATCG           |
